# Supplementary material for: Templateless nanostructuration of polymer surfaces
Source: Royal Society of Chemistry journal article supplement (doi:10.1039/c2sm06739k), 2012-01-01
Supplement: c2sm06739k.pdf [file c2sm06739k.pdf]

## Supporting information

### Templateless nanostructuring of polymer surfaces

Juan P. Fernández-Blázquez, Aránzazu del Campo\*

Max-Planck-Institut für Polymerforschung, Mainz, Germany

\*contact: delcampo@mpip-mainz.mpg.de

Max-Planck-Institut für Polymerforschung, Ackermannweg 10, 55128-Mainz, Germany. Tel  
+49 (0)6131 379563, Fax +49 (0)6131 379271

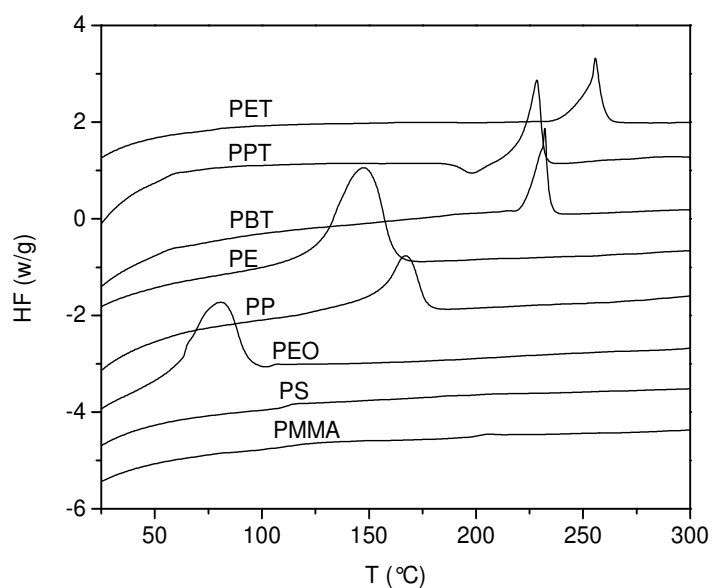

Figure A: DSC melting profiles at 20 °Cmin<sup>-1</sup> for all samples.

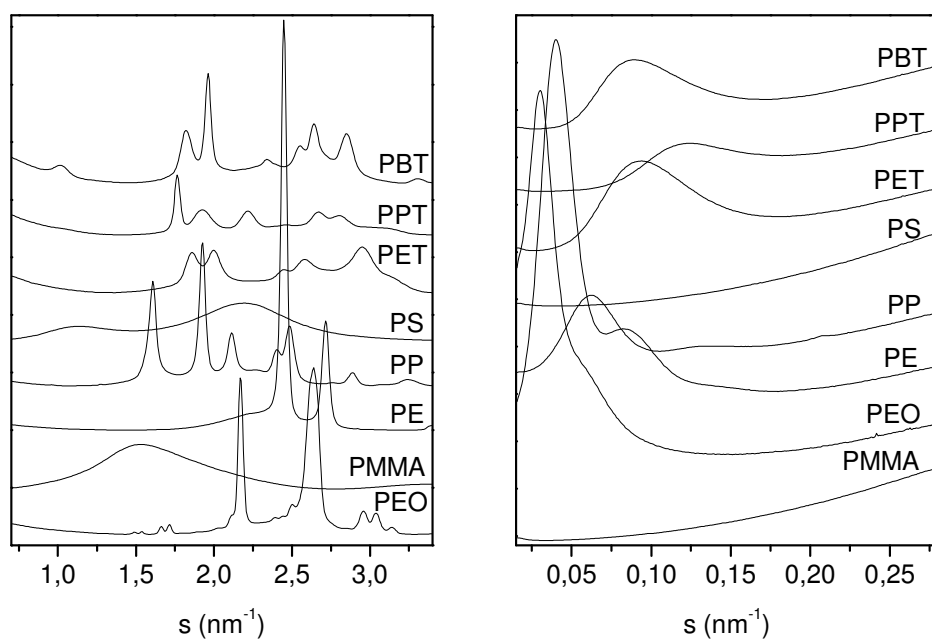

Figure B. X-ray patterns of all polymers performed at room temperature. Left: WAXS pattern; Right: SAXS pattern.

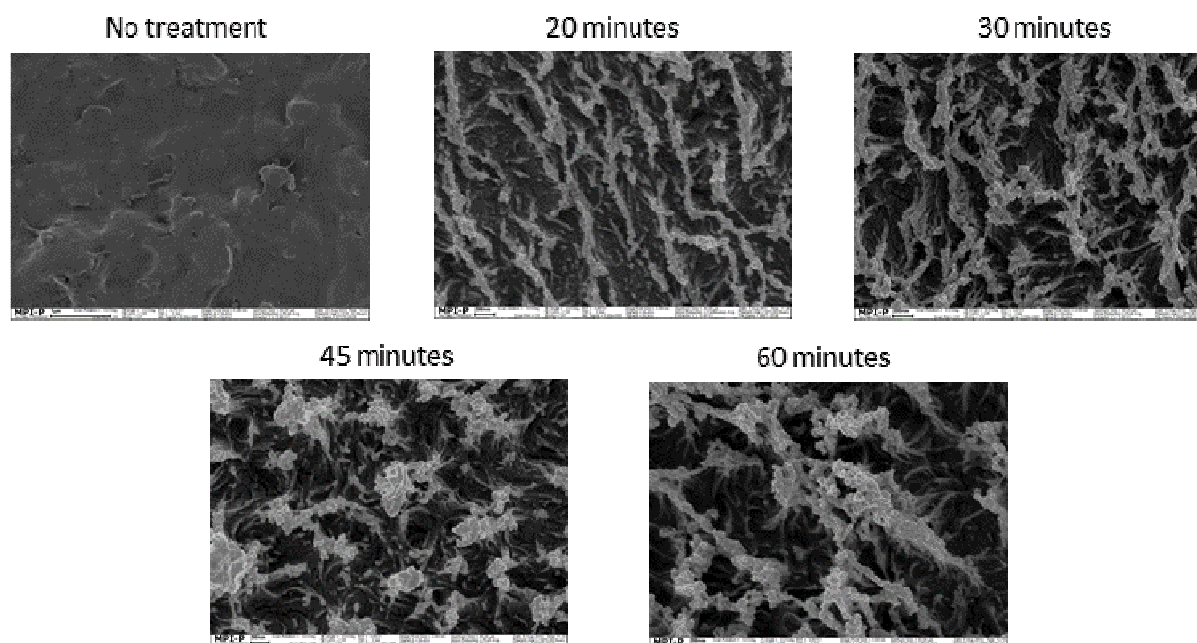

Figure C. Top view SEM images showing the topography on polyethylene (PE) polymer surface after oxygen plasma treatment at different times.

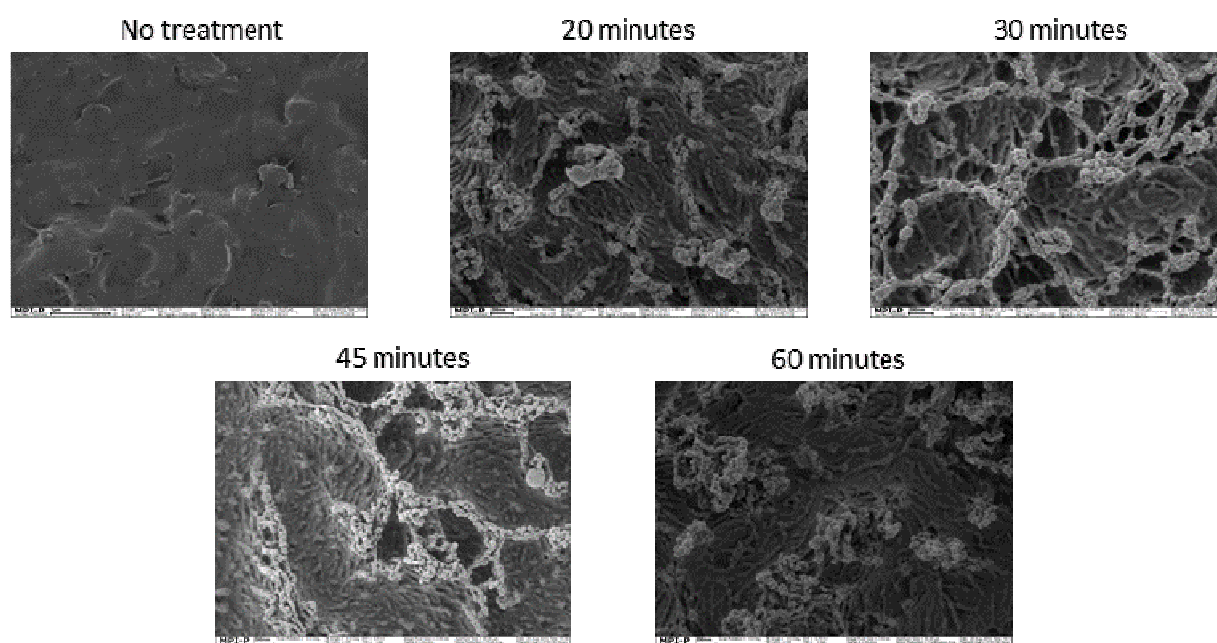

*Figure D. Top view SEM images showing the topography on polypropylene (PP) polymer surface after oxygen plasma treatment at different times.*

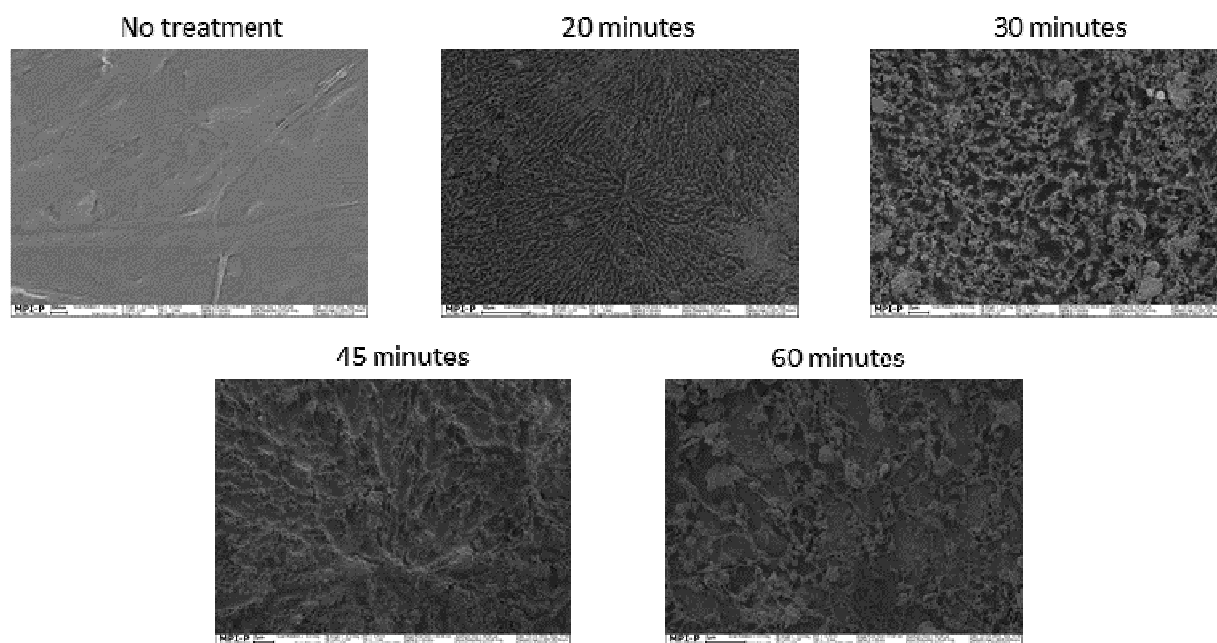

*Figure E. Top view SEM images showing the topography on polyethylene oxide (PEO) polymer surface after oxygen plasma treatment at different times.*

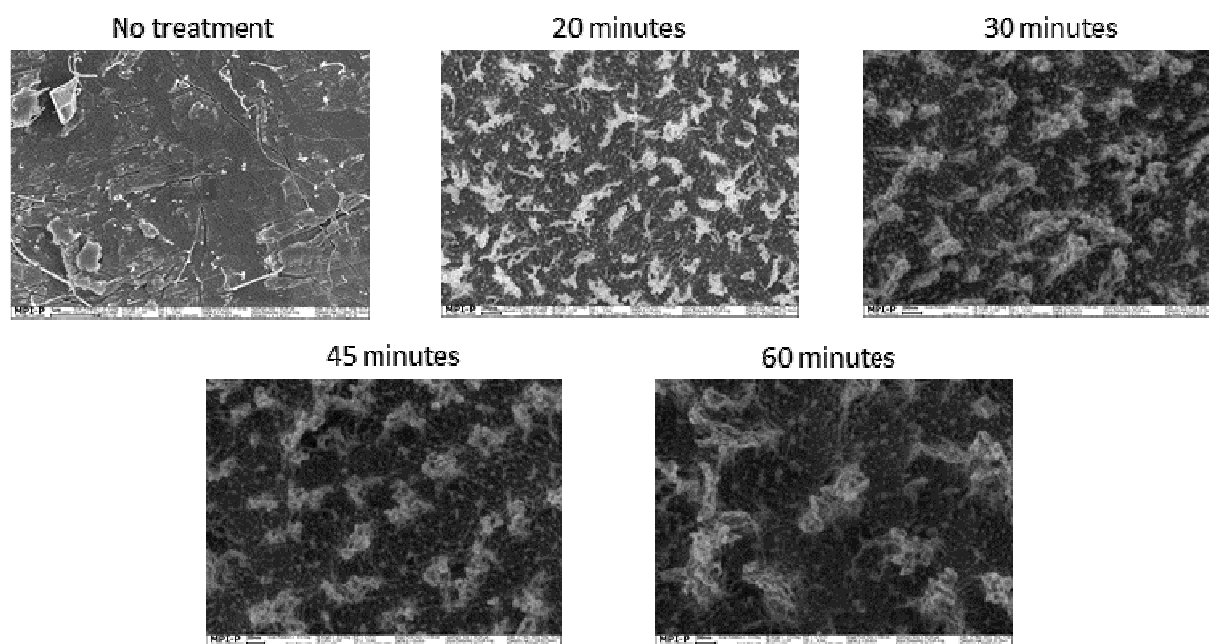

*Figure F. Top view SEM images showing the topography on polyethylene terephthalate (PET) polymer surface after oxygen plasma treatment at different times.*

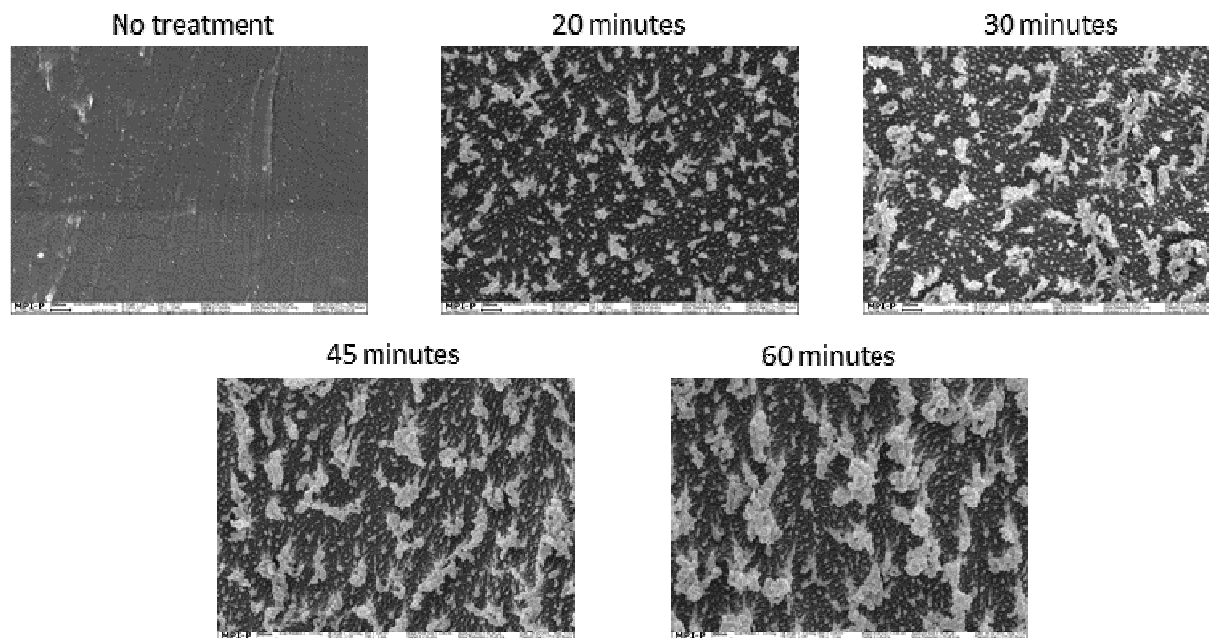

*Figure G. Top view SEM images showing the topography on polypropylene terephthalate (PPT) polymer surface after oxygen plasma treatment at different times.*

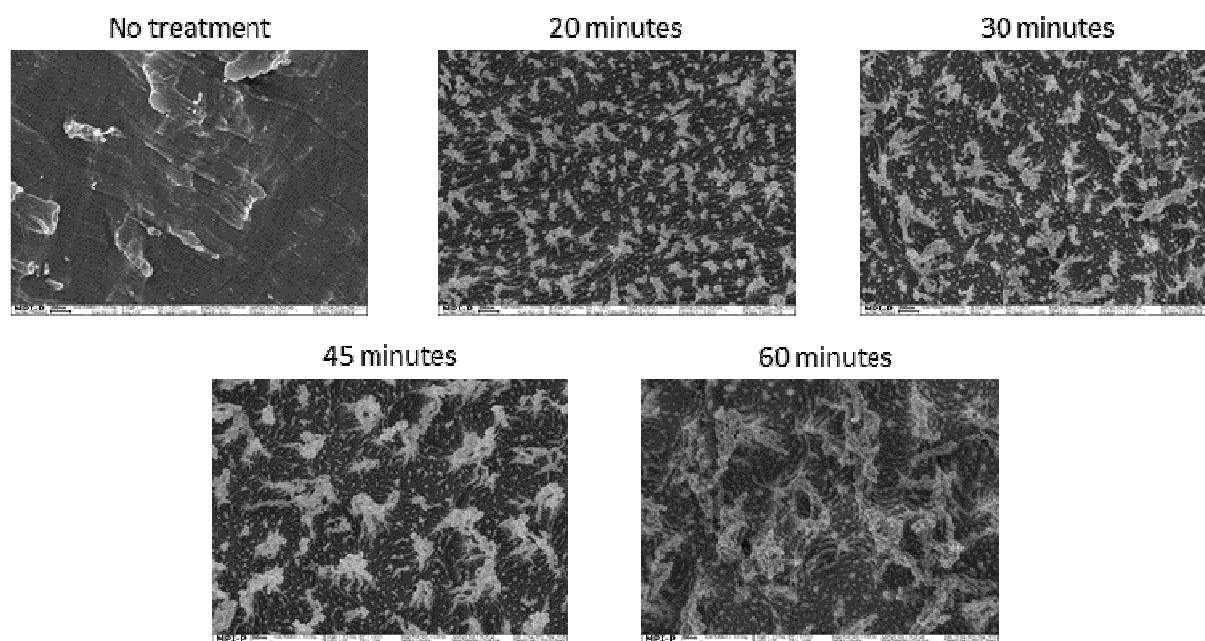

*Figure H. Top view SEM images showing the topography on polybutylene terephthalate (PBT) polymer surface after oxygen plasma treatment at different times.*

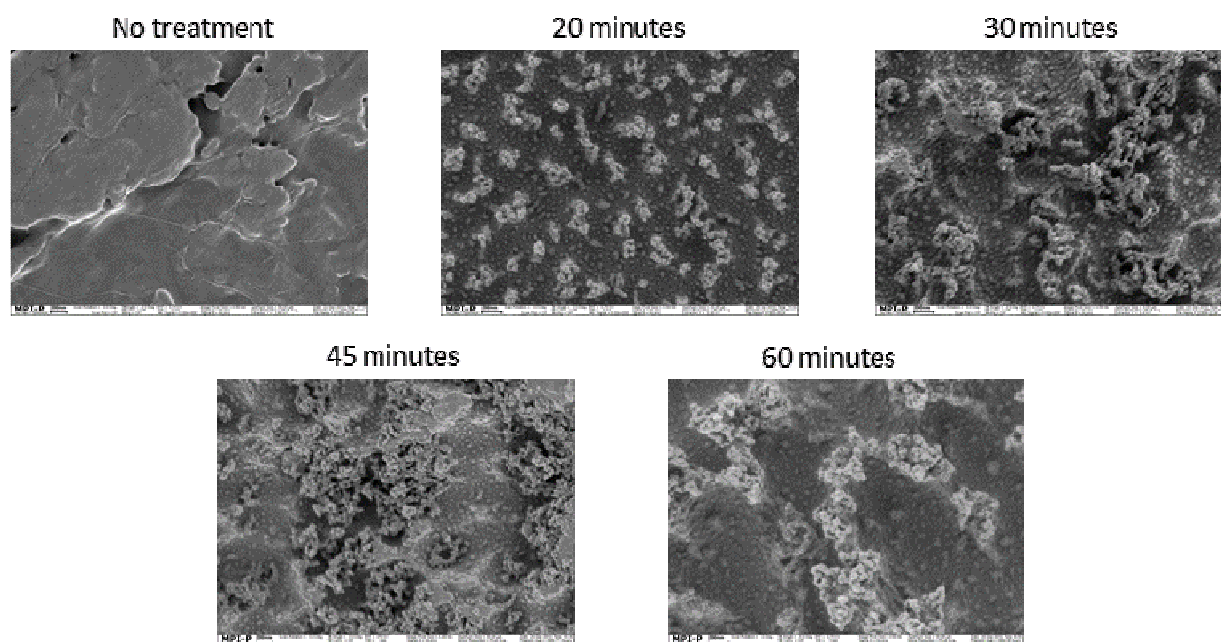

*Figure I. Top view SEM images showing the topography on polymethylmethacrylate (PMMA) polymer surface after oxygen plasma treatment at different times.*

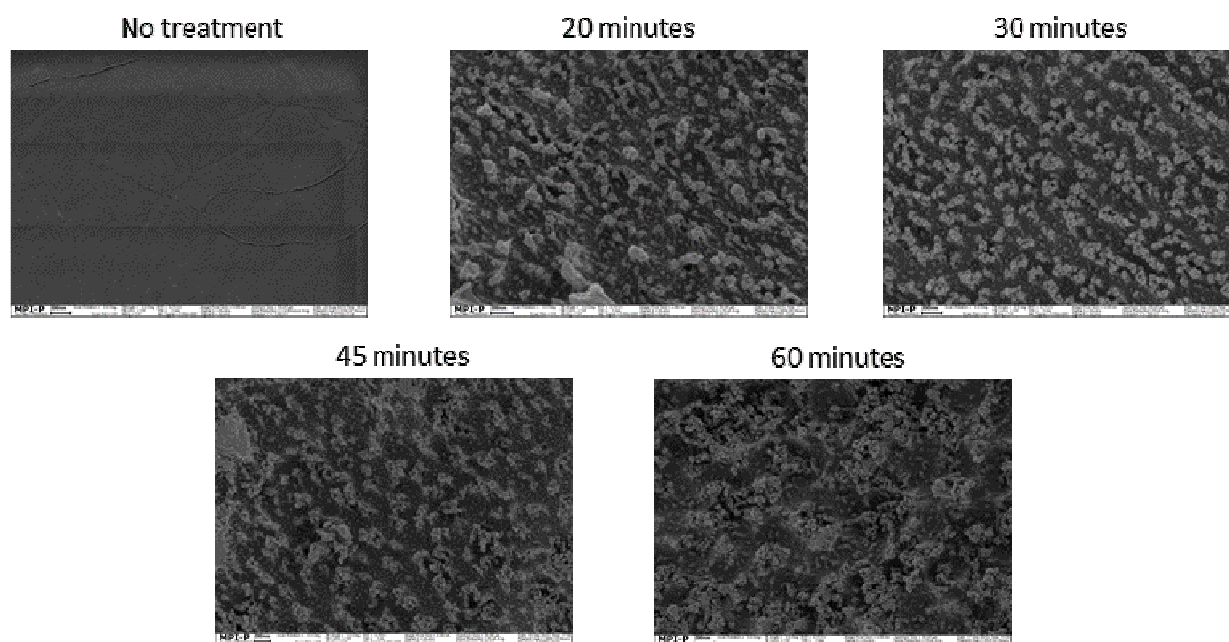

Figure J. Top view SEM images showing the topography on polystyrene (PS) polymer surface after oxygen plasma treatment at different times.

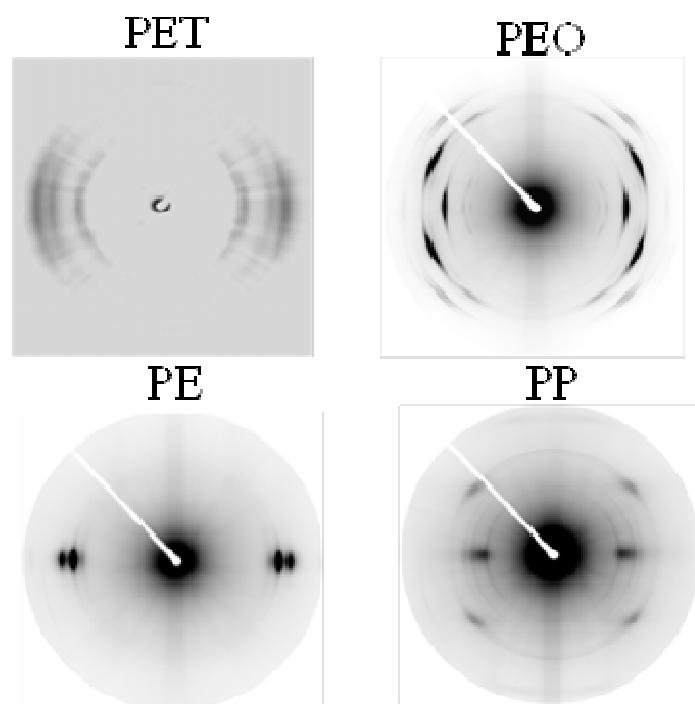

Figure K. 2D X-ray patterns corresponding to uniaxially stretched PET, PEO, PE and PP samples studied in the manuscript.
